# Supplementary material for: Ultrathin Ru–Ni nanounits as hydrogen oxidation catalysts with an alkaline electrolyte
Source: Royal Society of Chemistry journal article supplement (doi:10.1039/d2dt02373c), 2022-01-01
Supplement: d2dt02373c1.pdf [file d2dt02373c1.pdf]

## Supplementary Information for

# Ultrathin Ru-Ni Nanounits as Hydrogen Oxidation Catalyst with Alkaline Electrolyte

Yuanjun Liu,<sup>a\*</sup> Longkun Zuo,<sup>a</sup> Zhihang Zhou,<sup>a</sup> Junhao Zhang,<sup>a</sup> Ziliang Kang,<sup>b</sup> Jun Zhu,<sup>c</sup> Guoxing Zhu<sup>b\*</sup>

<sup>a</sup>School of Environmental and Chemical Engineering, Jiangsu University of Science and Technology, Zhenjiang, China, Email: liuyuanjun@just.edu.cn

<sup>b</sup>School of Chemistry and Chemical Engineering, Jiangsu University, Zhenjiang, China, Email: [zhuguoxing@ujs.edu.cn](mailto:zhuguoxing@ujs.edu.cn)

<sup>c</sup>Faculty of Transportation Engineering, Huaiyin Institute of Technology, Huaian, China

*Chemicals.* Potassium aquapentachloro-ruthenate (III) ( $K_2RuCl_5 \cdot H_2O$ ) and potassium hydroxide (KOH) were purchased from Aladdin Biochemical Technology Co., Ltd (Shanghai). Nafion and commercial Pt/C (20 wt% of Pt) were purchased from Sinero Technology Co., Ltd (Suzhou). Nickel (II) formate dehydrate ( $Ni(HCOO)_2 \cdot 2H_2O$ ), Polyvinyl pyrrolidone (PVP, MW = 58000), Sulfuric acid ( $H_2SO_4$ ), Cupric sulfate ( $CuSO_4$ ), Ethanol ( $CH_3CH_2OH$ ), and acetone ( $CH_3COCH_3$ ) were obtained from Macklin Biochemical Co., Ltd (Shanghai). All of the chemicals were used as received without further purification. The ultra-pure deionized water ( $18.2 M\Omega cm^{-1}$ ) was used in the experiments.

*Characterization.* Crystal phase structure of the samples was characterized by powder XRD on a Bruker D-8 Advanced diffractometer with Cu  $K\alpha$  ( $\lambda=1.5418 \text{ \AA}$ ) radiation. The microstructures of the samples were checked by a (high-resolution) transmission electron microscope (HR-TEM, JEM-200CX). X-ray photoelectron spectra (XPS) were

carried out by using a PHI 5000 Versa-Probe photoelectron spectrometer with an Al K $\alpha$  X-ray resource. The metal content in the catalyst were measured by inductively coupled plasma atomic emission spectrometry (ICP-AES, VARIAN VISTA-MPX). A spherical aberration electron microscope (FEI Titan G2 Cube) was also employed to check the sample. Fourier transform infrared spectra were collected on a Bruker VERTEX 70 spectrometer.

*The working electrode.* To prepare the catalysts ink, 2 mg of catalysts and 8 mg of acetylene black were dispersed in 1 mL solvent (which was prepared by mixing of 700  $\mu$ L of ethanol, 270  $\mu$ L of deionized water and 30  $\mu$ L of 0.05 wt% Nafion solution), which was then ultrasonicated for 1 h to obtain a homogeneous mixture. The glass carbon electrode (GCE, 5 mm in diameter and disk area of 0.196 cm<sup>2</sup>) was firstly polished with 0.05  $\mu$ m of Al<sub>2</sub>O<sub>3</sub> powder to acquire a bright surface. For HOR tests, 5  $\mu$ L of the catalyst ink was drop-casted on GCE surface (with mass loading of 0.05 mg cm<sup>-2</sup><sub>geo</sub>) and dried in air for 30 min. For HER tests, the preparation is similar to that of HOR except 15  $\mu$ L of catalyst ink was used (with mass loading of 0.03 mg cm<sup>-2</sup><sub>geo</sub>).

*Estimation of the ECSA values.* Cu-UPD method was used to evaluate the ECSA values for all catalysts. Briefly, the catalyst loaded working electrode was firstly cycled between 0.05 V to 0.7 V (vs RHE) at a scan rate of 10 mV s<sup>-1</sup> in 0.1 M N<sub>2</sub>-saturated H<sub>2</sub>SO<sub>4</sub> to obtain a repeatable voltammetry curve served as the background. The electrode was then kept at 0.3 V (vs RHE) in 0.1 M N<sub>2</sub>-saturated H<sub>2</sub>SO<sub>4</sub> contained 0.2 mM CuSO<sub>4</sub> for 150 s to deposit a Cu layer on electrode surface. Then, copper oxidation polarization curves were collected in the range of 0.3-0.7 V (vs RHE) at a scan rate of 10 mV s<sup>-1</sup>. The ECSA values were calculated via the following equation

$$ECSA = \frac{Q_{Cu}}{Q_s}$$

Where Q<sub>Cu</sub> and Q<sub>s</sub> represent the measured integral charge and surface charge density of 420  $\mu$ C cm<sub>metal</sub><sup>-2</sup> for monolayer adsorption of Cu-UPD stripping.

**Table S1.** ICP-AES analysis results for RuNi catalysts.

| Samples                         | Ru:Ni atomic ratio |
|---------------------------------|--------------------|
| Ru <sub>3</sub> Ni <sub>7</sub> | 1:2.22             |
| Ru <sub>5</sub> Ni <sub>5</sub> | 1:1.14             |
| Ru <sub>7</sub> Ni <sub>3</sub> | 1:0.42             |

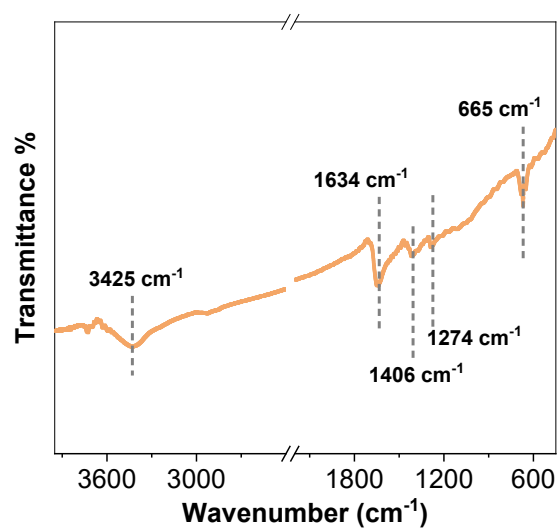

**Fig. S1.** FT-IR spectrum of the typical Ru<sub>5</sub>Ni<sub>5</sub> sample.

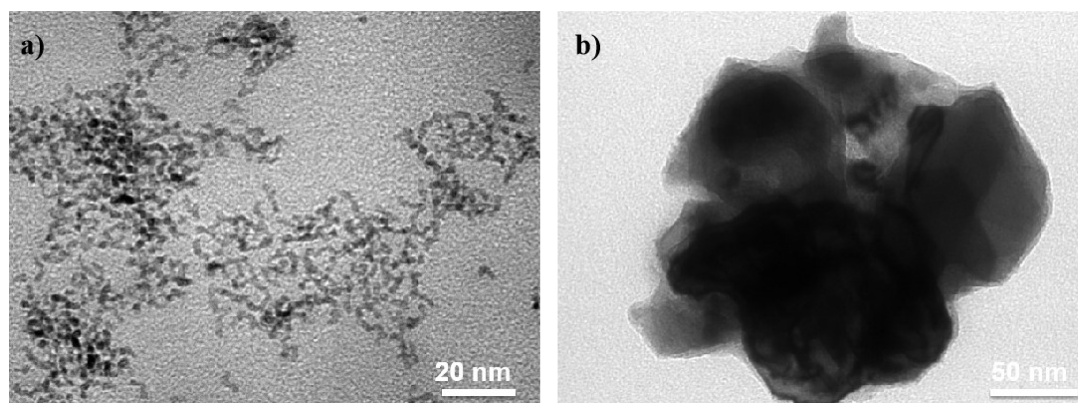

**Fig. S2.** TEM images of a) Ru and b) Ni NPs.

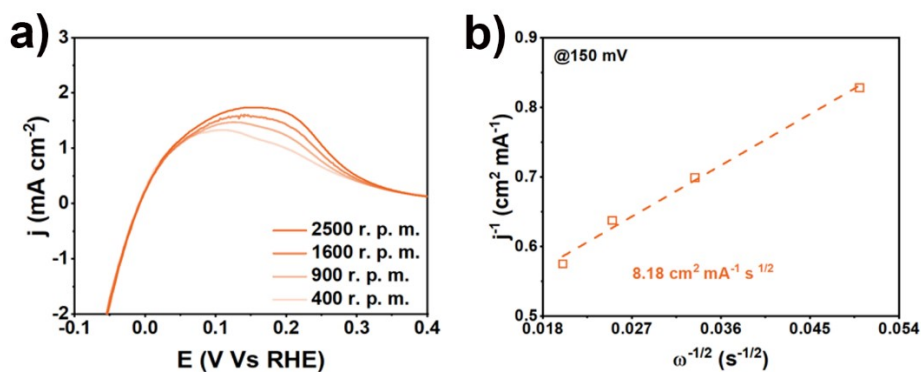

**Fig. S3.** a) HOR polarization curves of Ru in 0.1 M H<sub>2</sub>-saturated KOH at various rotating speeds. b) Corresponding Koutecky-Levich plots at 0.15 V.

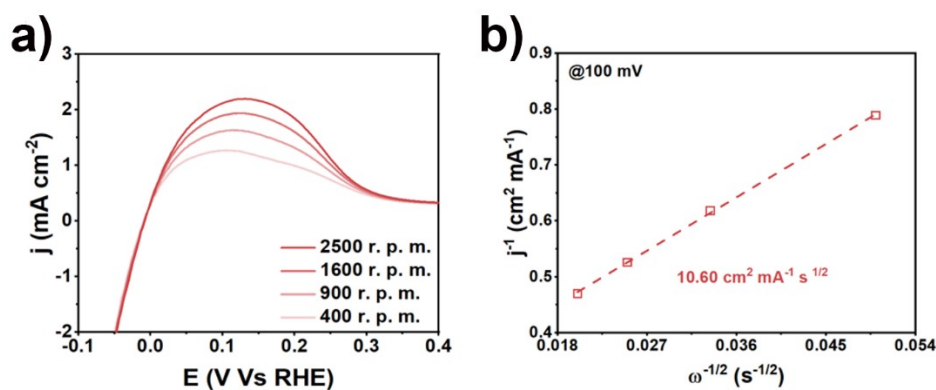

**Fig. S4.** a) HOR polarization curves of Ru<sub>7</sub>Ni<sub>3</sub> in 0.1 M H<sub>2</sub>-saturated KOH at various rotating speeds. b) Corresponding Koutecky-Levich plots at 0.1 V.

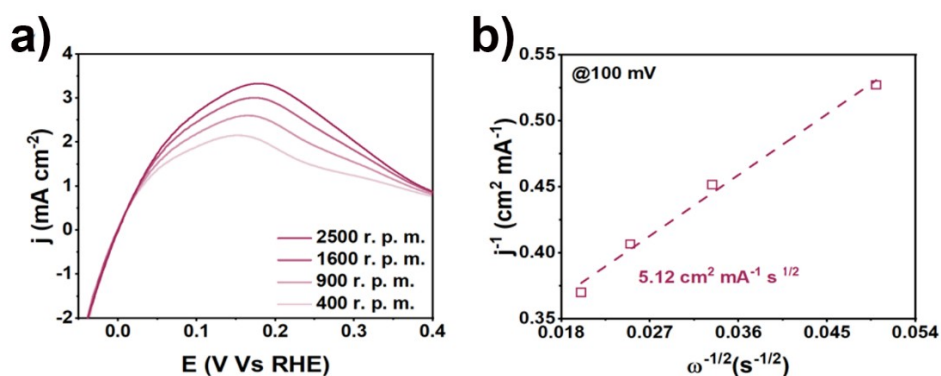

**Fig. S5.** a) HOR polarization curves of Ru<sub>5</sub>Ni<sub>5</sub> in 0.1 M H<sub>2</sub>-saturated KOH at various rotating speeds. b) Corresponding Koutecky-Levich plots at 0.1 V.

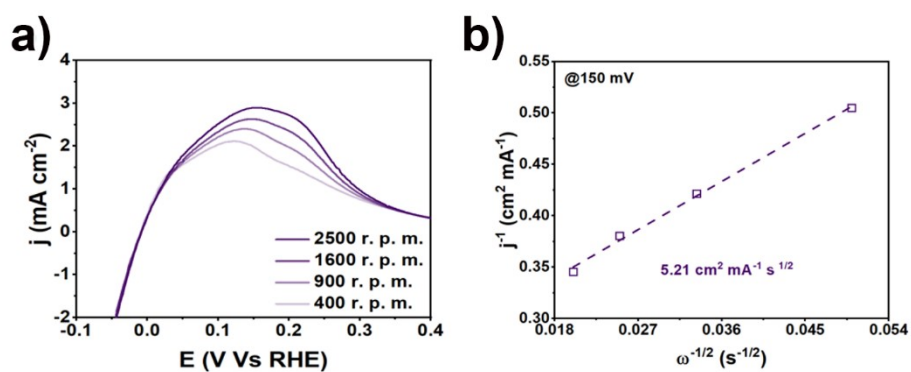

**Fig. S6.** a) HOR polarization curves of Ru<sub>3</sub>Ni<sub>7</sub> in 0.1 M H<sub>2</sub>-saturated KOH at various rotating speeds. b) Corresponding Koutecky-Levich plots at 0.15 V.

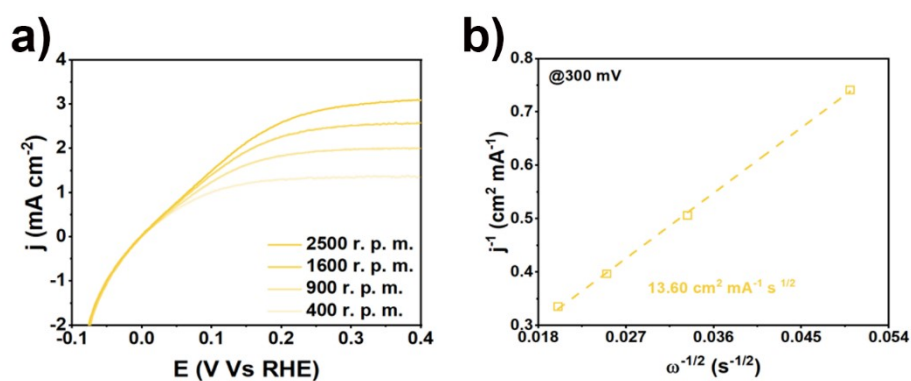

**Fig. S7.** a) HOR polarization curves of Pt/C in 0.1 M H<sub>2</sub>-saturated KOH at various rotating speeds. b) Corresponding Koutecky-Levich plots at 0.3 V.

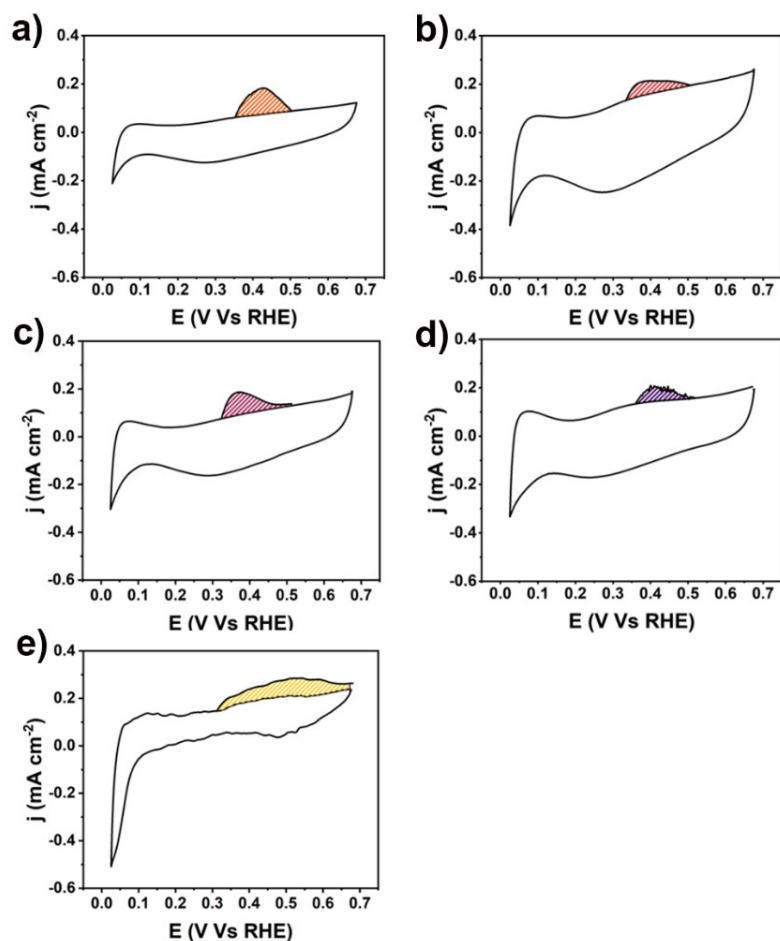

**Fig. S8.** CVs of catalysts collected with 0.5 M Ar-saturated  $\text{H}_2\text{SO}_4$  contained 5mM  $\text{CuSO}_4$  and the corresponding Cu-UPD stripping voltammograms of a) Ru, b)  $\text{Ru}_7\text{Ni}_3$ , c)  $\text{Ru}_5\text{Ni}_5$ , d)  $\text{Ru}_3\text{Ni}_7$  and e) Pt/C.  $10 \text{ mV s}^{-1}$  was applied for all ECSA evaluation.

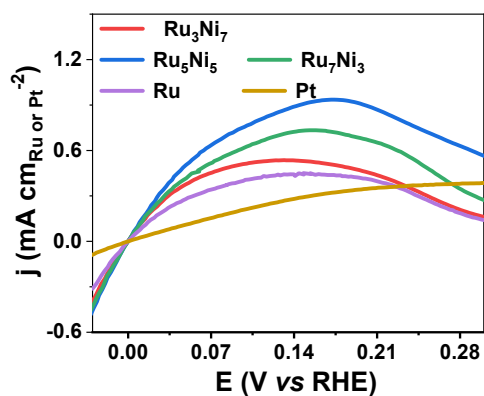

**Fig. S9.** HOR polarization curves of the typical samples normalized by the estimated Ru or Pt electrochemical active specific surface area, further suggesting the excellent catalytic activity of RuNi products.

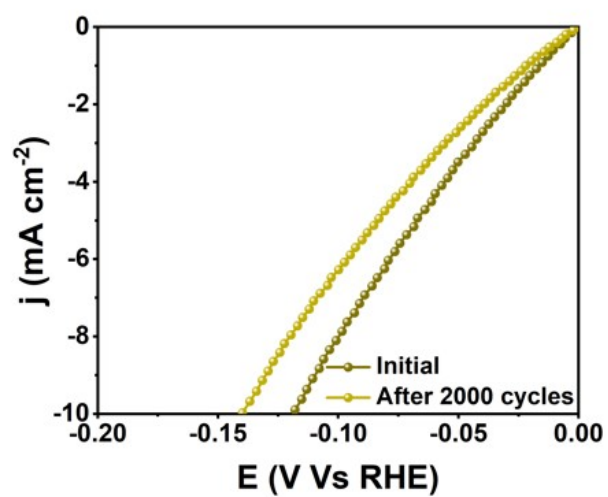

**Fig. S10.** HER polarization curves of Ru<sub>5</sub>Ni<sub>5</sub> before and after stability evaluation in 0.1 M N<sub>2</sub>-saturated KOH at the rotating speed of 1600 rpm.
